# Supplementary material for: Bacterial and Viral Co-Infections in COVID-19 Patients: Etiology and Clinical Impact
Source: Preprints.org preprint supplement (doi:10.20944/preprints202408.1995.v1), 2024-08-28
Supplement: Supplementary file 1 [file supplementary]

## Sheet: Sheet1
Table S2. Primers and probes used for multiplex real-time PCR to detect respiratory viruses: sequences, sizes, and concentrations.
			Total Concentration	Fluorescent Dye
Virus	Gene	Sequence 5’→3’
		F: GCC ACG GTG GGG TTT CTA AAC TT	500 nM
Adenovirus	HEXON	R: GCC CCA GTG GTC TTA CAT GCA CAT C	500 nM	Texas red
(AdV)		P: TGC ACC AGA CCC GGG CTC AGG TAC TCC GA	100 nM
Respiratory syncytial virus (RSV)		F: GGC AAA TAT GGA AAC ATA CGT GAA	500 nM
	М	R: TCT TTT TCT AGG ACA TTG TAY TGA ACA G	250 nM	HEX
		P: CTG TGT ATG TGG AGC CTT CGT GAA GCT	50 nM
Parainfluenza type 1		F: AGT TGT CAA TGT CTT AAT TCG TAT CAA T	500 nM
(PIV1)	HN	R: TCG GCA CCT AAG TAA TTT TGA GTT	500 nM	FAM
		P: ATA GGC CAA AGA “T” TGT TGT CGA GAC TAT TCC AA	50 nM
Bocavirus (BoV)		F: TGC AGA CAA CGC YTA GTT GTT T	500 nM
	NS1	R: CTG TCC CGC CCA AGA TAC A	500 nM	Cy5
		P: CCA GGA TTG GGT GGA ACC TGC AAA	100 nM
		F: CPA GCC TGC GTG GC	1000 nM
Rhinovirus	5’NCR	R: GAA ACA CGG ACA CCC AAA GTA	1000 nM	HEX
(RV)		P: TCC TCC GGC CCC TGA ATG YGG C	100 nM
Parainfluenza type 2		F: GCA TTT CCA ATC TAC AGG ACT ATG A	750 nM
(PIV2)	HN	R: ACC TCC TGG TAT AGC AGT GAC TGA AC	750 nM	FAM
		P: CCA TTT ACC “T”AAG TGA TGG AAT CAA TCG CAA A	50 nM
Human metapneumovirus		F: CAA GTG TGA CAT TGC TGA YC	600 nM
(HMPV)	F	R: ACT GCC GCA CAA CAT TTA GR	600 nM	HEX
		P: TGG CYG TYA GCT TCA GTC AAT TCA ACA GA	100 nM
		F: TGG YTC AAT CTC AAC AAC AAG ATT TAA G	750 nM
Parainfluenza type 1		R: TAC CCG AGA AAT ATT ATT TTG CC	500 nM	FAM
(PIV3)	HN	P: CCC RTC TG“T”TGG ACC AGG GAT ATA CTA CAA A	200 nM
		F: CAG TCA AAT GGG CTG ATG CA	750 nM
HCoV-229E	NP	R: AAA GGG CTA TAA AGA GAA TAA GGT ATT CT	500 nM	Texas red
		P: CCC TGA CGA CCA CGT TGT GGT TCA	50 nM
		F: CCT TGC GAA TGA ATG TGC T	100 nM
HCoV-HKU-1	NP	R: TTG CAT CAC CAC TGC TAG TAC CAC	750 nM	FAM
		P: TGT GTG GCG GTT GCT ATT ATG TTA AGC CTG	50 nM
		F: GAC CAA AGC ACT GAA TAA CAT TTT CC	250 nM
HCoV-NL63	NP	R: ACC TAA TAA GCCTCTTTCTCAACCC	250 nM	FAM
		P: ACC TAA TAA GCC TCT TTC TCA ACC C	50 nM
		F: CGA TGA GGC TAT TCC GAC TAG GT	500 nM
HCoV-OC43	NP	R: CCT TCC TGA GCC TTC AAT ATA GTA ACC	750 nM	HEX
		P: TCC GCC TGG CAC GGT ACT CCC T	50 nM
